# Supplementary material for: Association of Cost-Driven Residential Moves With Health-Related Outcomes Among California Renters
Source: PubMed Central journal article supplement (PMC10015305; doi:10.1001/jamanetworkopen.2023.2990), 2023-03-14
Supplement: jamanetwopen-e232990-s002.pdf [file jamanetwopen-e232990-s002.pdf]

## Data Sharing Statement

Chen. Association of Cost-Driven Residential Moves With Health-Related Outcomes Among California Renters. *JAMA Netw Open*. Published March 14, 2023.

doi:10.1001/jamanetworkopen.2023.2990

### Data

**Data available:** No

### Additional Information

**Explanation for why data not available:** Data are managed by the California Health Interview Survey (CHIS). We analyzed the restricted-use CHIS dataset that are only available by application to the CHIS Data Access Center.
